# Supplementary material for: Bacterial secretion system skews the fate of Legionella-containing vacuoles towards LC3-associated phagocytosis
Source: PubMed Central journal article supplement (PMC5357938; doi:10.1038/srep44795), 2017-03-20
Supplement: srep44795-s1.pdf [file srep44795-s1.pdf]

1 **Supplemental Information to**

2

3 **Bacterial secretion system skews the fate of *Legionella*-containing**  
4 **vacuoles towards LC3-associated phagocytosis.**

5 Andree Hubber<sup>1</sup>, Tomoko Kubori<sup>1</sup>, Cevayir Coban<sup>2</sup>, Takeshi Matsuzawa<sup>3</sup>,  
6 Michinaga Ogawa<sup>4</sup>, Tsuyoshi Kawabata<sup>5</sup>, Tamotsu Yoshimori<sup>5</sup> and Hiroki  
7 Nagai<sup>1\*</sup>

8

9 1. Research Institute for Microbial Diseases, Osaka University, 3-1 Yamadaoka,  
10 Suita, Osaka 565-0871, Japan

11 2. Laboratory of Malaria Immunology, Immunology Frontier Research Centre,  
12 Osaka University, 3-1 Yamadaoka, Suita, Osaka 565-0871, Japan

13 3. Graduate School of Life and Environmental Sciences, Osaka Prefecture  
14 University, Rinku Ohrai Kita 1-58, Izumisano, Osaka 598-8531, Japan

15 4. Department of Bacteriology I, National Institute of Infectious Diseases,  
16 Toyama 1-23-1, Shinjuku-ku, Tokyo 162-8640, Japan

17 5. Department of Genetics, Osaka University Graduate School of Medicine, 2-  
18 2 Yamadaoka, Suita, Osaka 565-0871, Japan

19

20 \*To whom correspondence should be addressed

21 Email: [hnagai@biken.osaka-u.ac.jp](mailto:hnagai@biken.osaka-u.ac.jp)

22 Telephone: +81 6 6879 8361

23 Fax: +81 6 6879 8361

24

25 **Figure S1. The *L. dumoffii* replicates in ER-like vacuoles in a Dot/Icm type**  
 26 **IV secretion system dependent manner.**

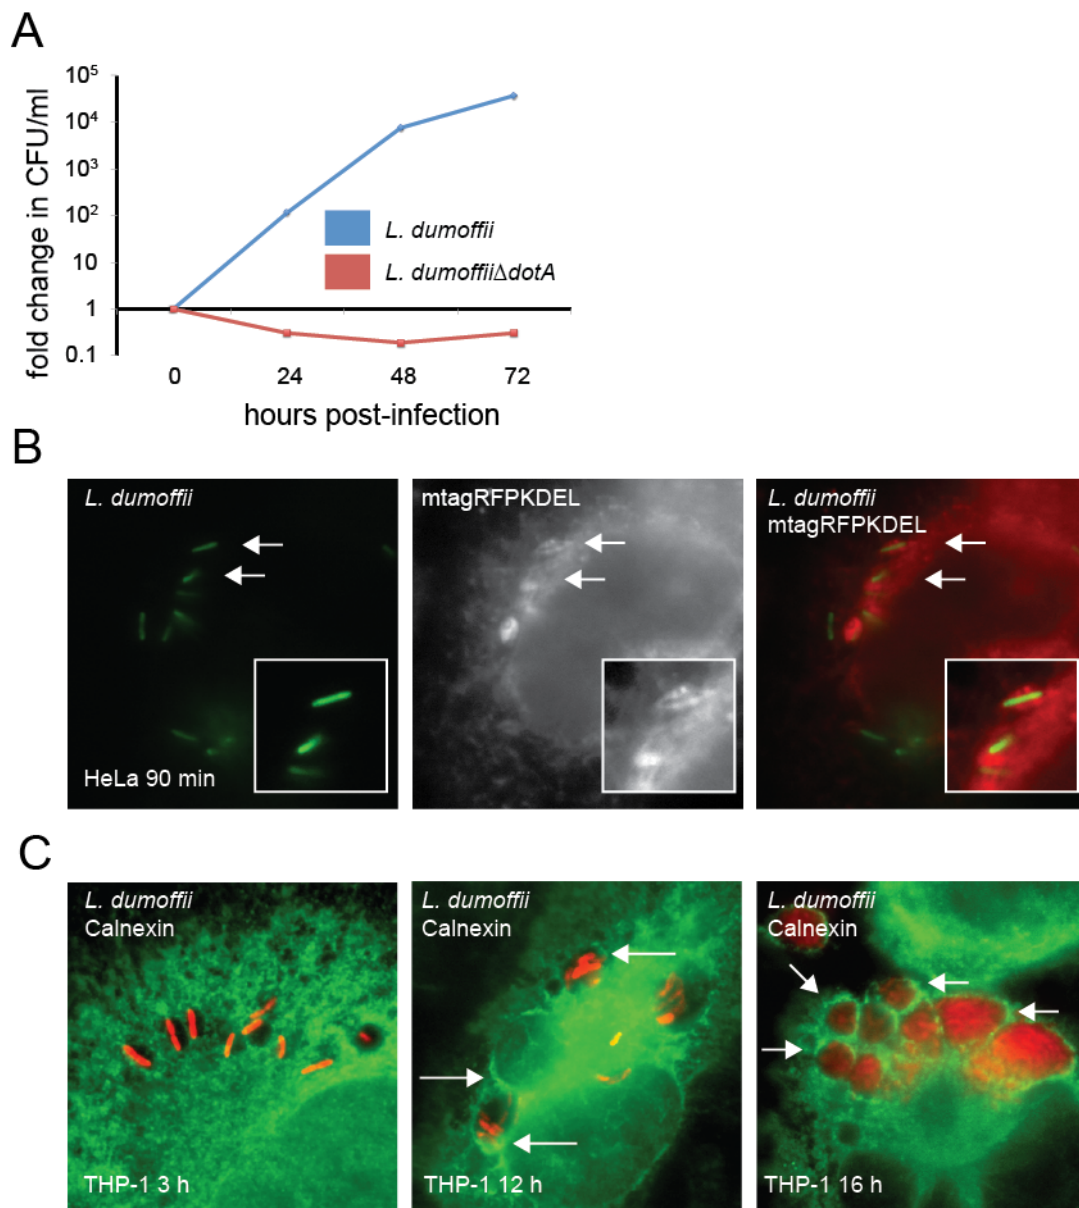

27  
 28 (A) Graph showing fold change in CFU/ml of *L. dumoffii* NY23 Str<sup>R</sup> and *L.*  
 29 *dumoffii* $\Delta$ *dotA* NY23 Str<sup>R</sup> in THP-1 cells over 3 days. Data are from a single  
 30 experiment and values shown are the average of three independent infections  
 31 each performed with triplicate wells. Error bars are  $\pm$  SEM. (B) Fluorescent  
 32 image of a HeLa Fc $\gamma$ RII cell transfected with mtagRFP-KDEL (red) and infected  
 33 with *L. dumoffii* constitutively expressing GFPmut3 (green). Clear localization

34 of the tagged-KDEL to the bacterial phagosome was observed at 90 min post-  
35 infection as indicated by white arrows and enlarged in inset. (C) Fluorescent  
36 image of human THP-1 cells infected with *L. dumoffii* constitutively expressing  
37 mCherry (red). ER-association was assessed by indirect immunofluorescence  
38 using a primary antibody raised against the C-terminal (ER luminal) region of  
39 calnexin (Enzo#ADI-SPA-860). Image taken at 12 and 16 hours post-infection  
40 show positive association of calnexin with *L. dumoffii*-containing phagosomes  
41 as shown by white arrows.  
42

43 **Figure S2. Galectin-8 and adapters commonly involved in LC3-**  
 44 **recruitment are not associated with LdCVs.**

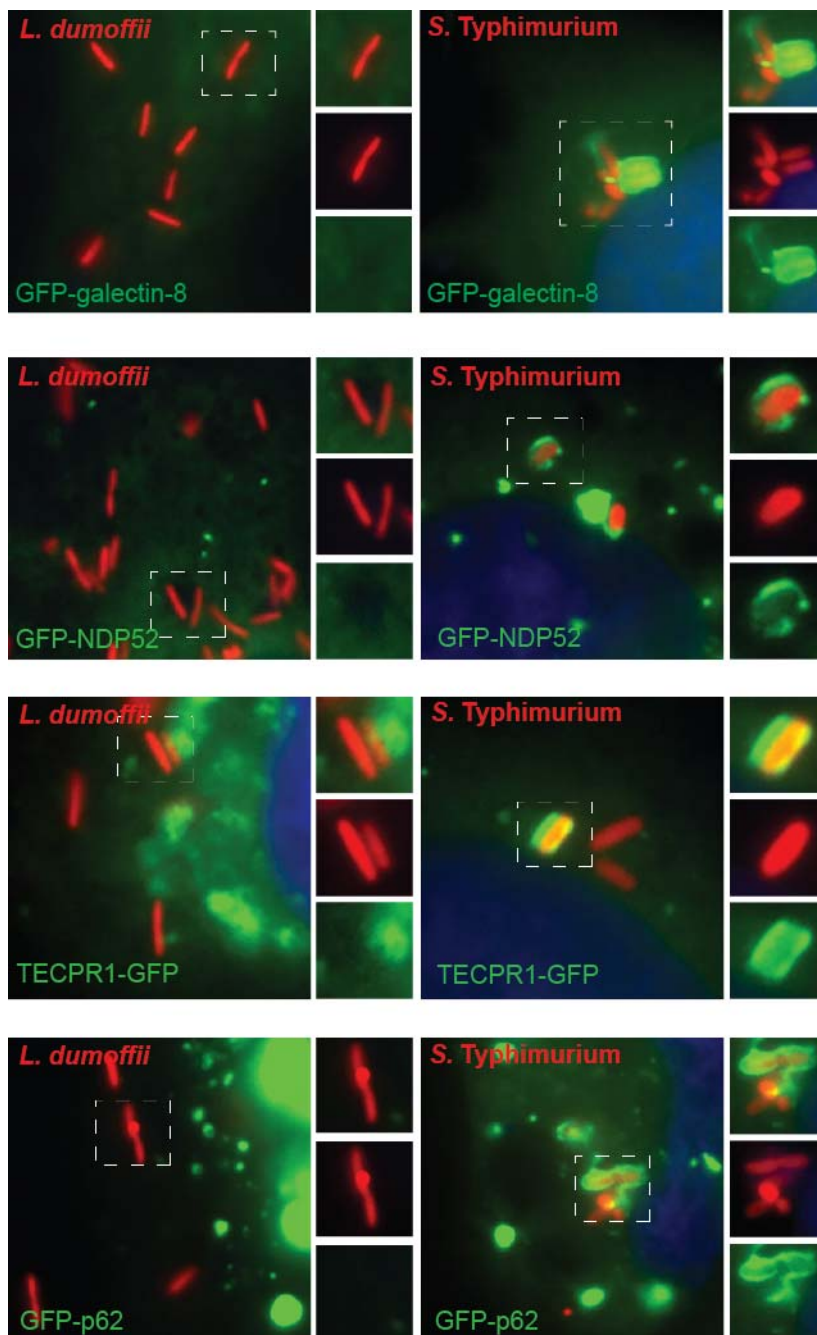

45  
 46 HeLa cells stably expressing Fc $\gamma$ RII receptor were co-transfected with pTLR2  
 47 (see Figure 6) and a single GFP-expression construct, as shown in fluorescent  
 48 micrographs; top to bottom: GFP-galectin-8, GFP-NDP52, Tecpr1-GFP, and  
 49 GFP-p62. Images shown are at 2 hours post-infection for opsonized *L. dumoffii*

50 (left) and *S. Typhimurium* (right), both organisms harbour plasmids for  
51 constitutive expression of mCherry (red).

52

53

54 **Figure S3. *L. dumoffii* $\Delta$ *flaA* replicates robustly in C57BL/6J (B6)-derived**  
55 **macrophages.**

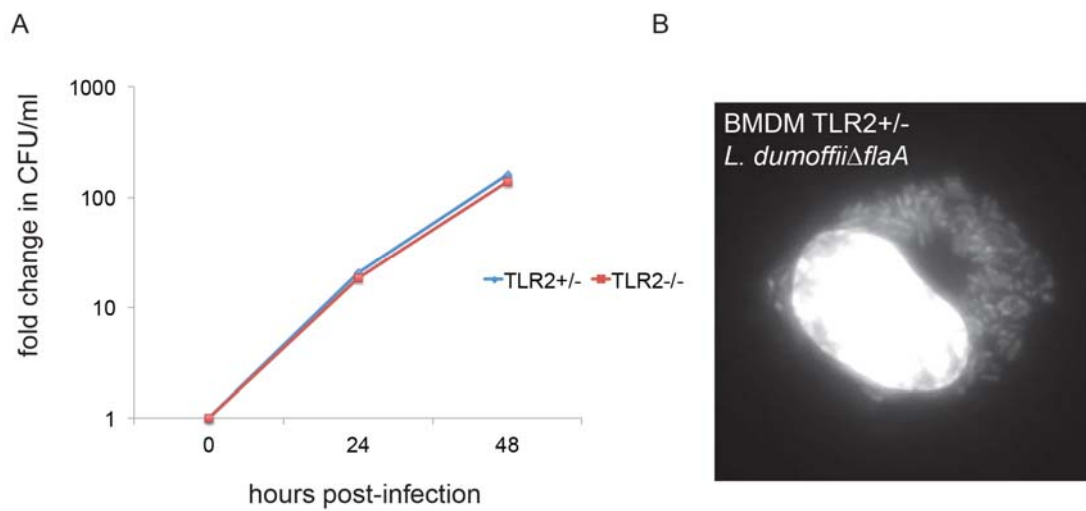

56

57 (A). Graph showing fold change in CFU/ml of *L. dumoffii* NY23  $\Delta$ *flaA* over 2  
58 days in bone marrow-derived macrophages from TLR2<sup>+/-</sup> and TLR2<sup>-/-</sup> C57BL/6J  
59 (B6) mice. Data are average of three independent experiments, each performed  
60 in triplicate. (B) Representative micrograph of TLR2<sup>+/-</sup> macrophage infected  
61 with *L. dumoffii* $\Delta$ *flaA*. Nuclear and bacterial DNA is stained with Hoechst 33342.

62

63 **Figure S4. LC3-recruitment to LdCVs is independent of Ulk1.**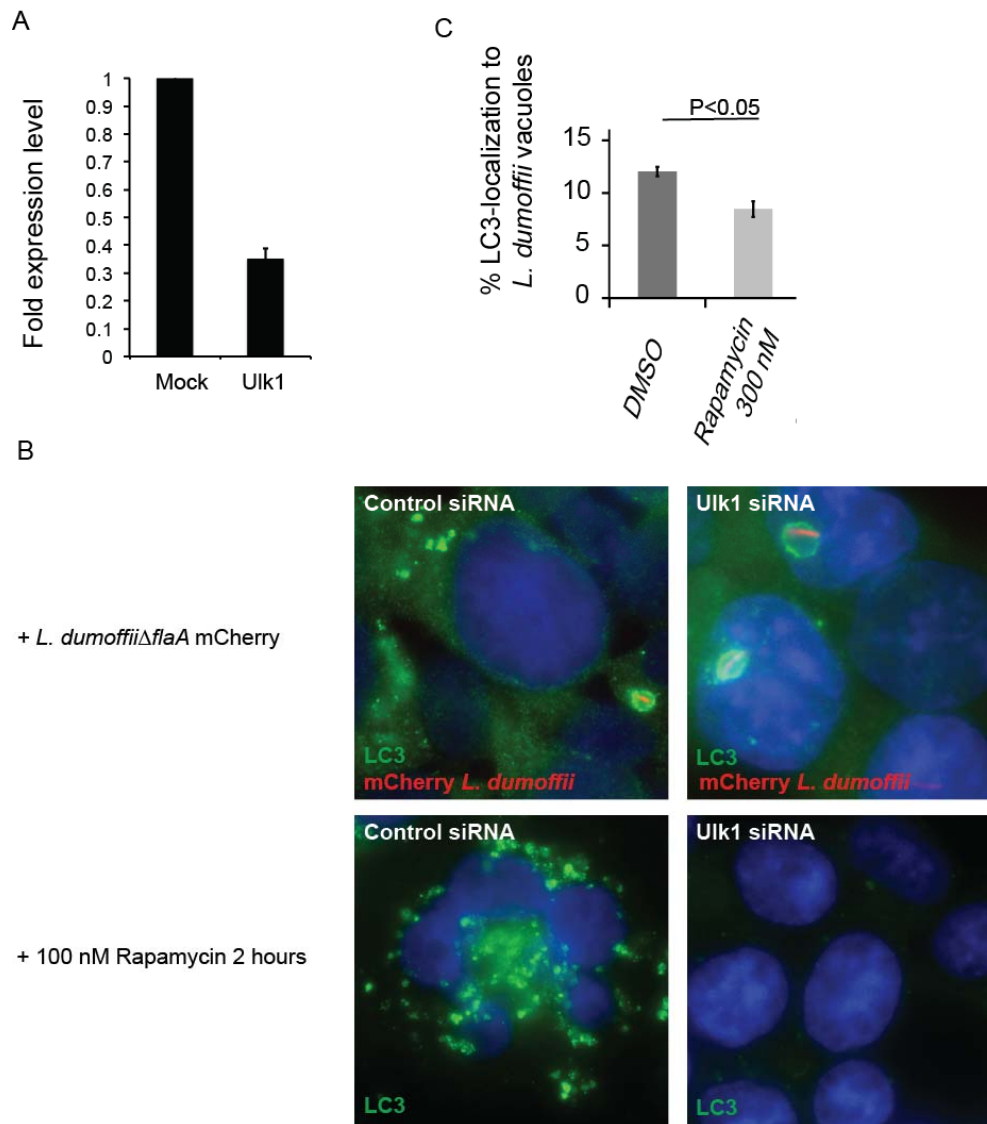

64

65 (A) qRT-PCR measuring Ulk1 mRNA levels in HEK293 cells 3 days post-  
 66 transfection for scrambled (mock) and Ulk1 siRNA-treated cells. Data are  
 67 normalized to GAPDH and shown as fold expression level compared to mock-  
 68 transfected cells. (B) Representative images of LC3-localization in HEK293  
 69 cells transfected with scrambled (control) or Ulk1-siRNA and infected with  
 70 mCherry-expressing *L. dumoffii* for 3 hours or treated with 100 nM of the  
 71 autophagy inducer rapamycin for 2 hours. (C) Quantification of LC3 recruitment  
 72 to *L. dumoffii* vacuoles at 3 hours post-infection in THP-1 cells treated with

73 DMSO (control) or Rapamycin. Data is the average of two independent  
74 experiments performed in triplicate. Student's t-test was used to determine  
75 significance.

76

77

78



79 **Figure S5. Live imaging shows degradation of an LC3-positive *L. dumoffii*.**

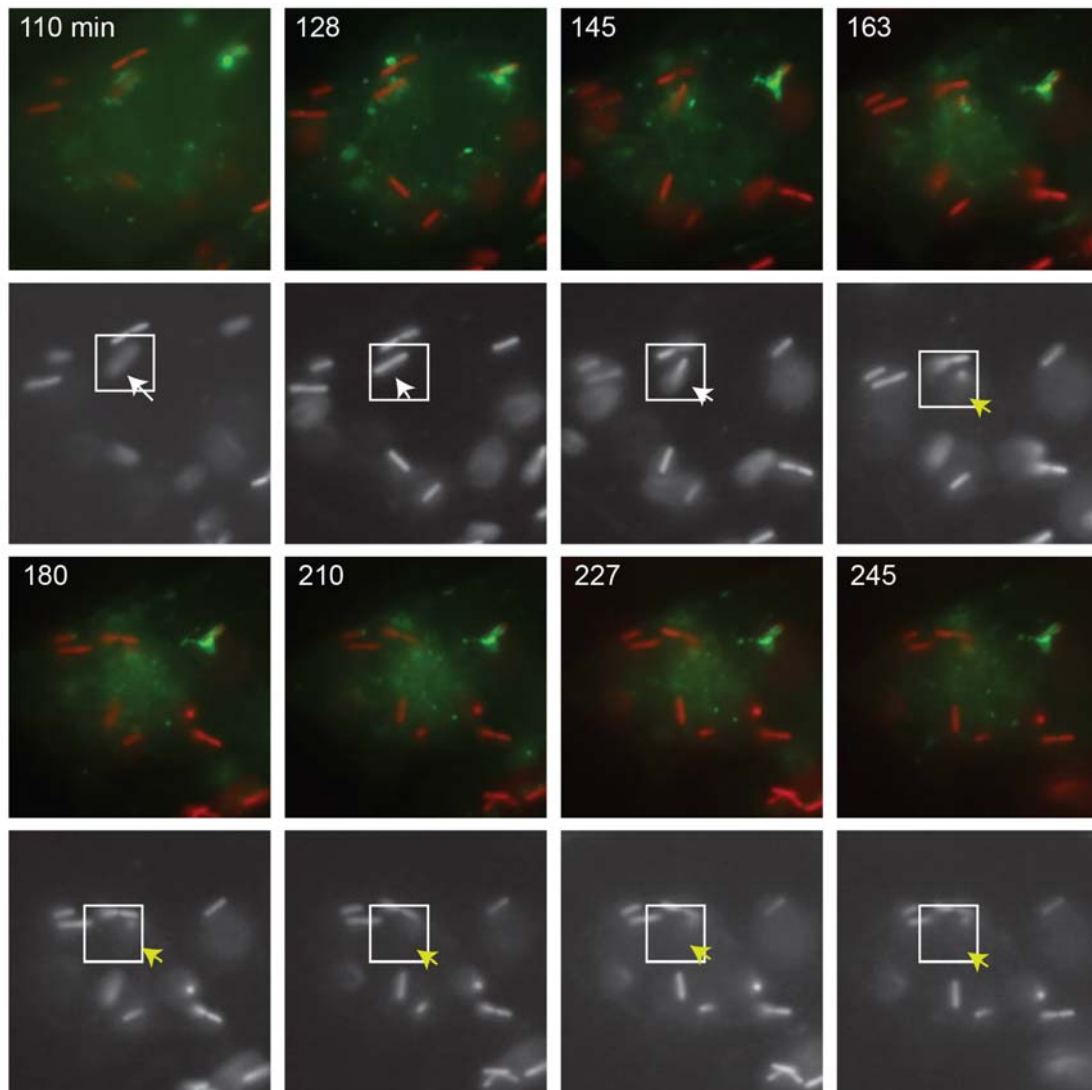

80

81 Micrographs show a time course of still images from 110 min to 245 min post-  
 82 infection for RAW264.7 GFP-LC3 cells infected with mCherry-expressing *L.*  
 83 *dumoffii*. Cells were incubated at 37°C on a heated stage and manually  
 84 refocused during the course of infection. The boxed bacterium is LC3-positive  
 85 at 110, 128, and 145 min post-infection (shown by white arrows). However, this  
 86 bacterium is no longer visible >163 min post-infection (as shown by yellow  
 87 arrows). In contrast, adjacent bacteria are still visible.

88

89 **Figure S6. Live imaging shows acidification of a subset of *L. dumoffii***  
 90 **vacuoles at time-points 3-5 hours post-infection, which is temporally**  
 91 **consistent with degradation of LC3-positive vacuoles.**

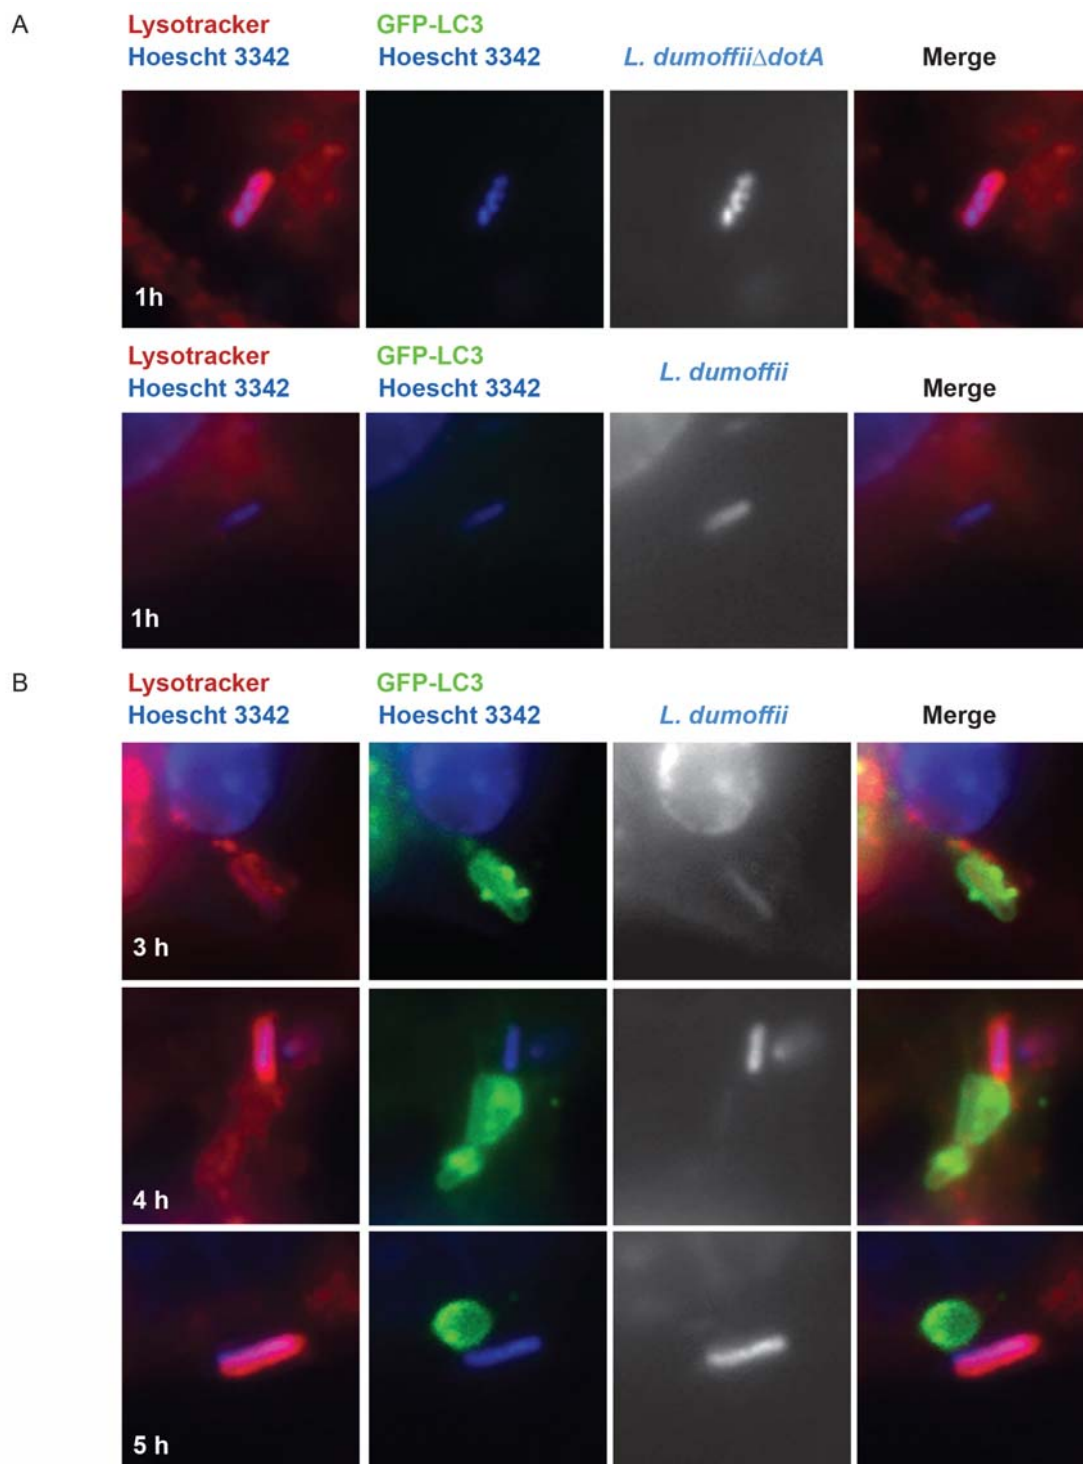

92

93 (A) Micrographs show representative images of RAW264.7 GFPLC3 cells  
 94 infected with Hoescht 3342-stained *L. dumoffii* $\Delta$ *dotA* (top) or *L. dumoffii*

95 (bottom) at 1 hour post-infection. Cells were incubated with 75 nM  
96 LysoTracker® Red DND-99 (Life Technologies#L7528) for 1 hour prior to  
97 infection and maintained in media throughout assay. Accumulation of the probe  
98 in compartments with a low pH is shown by a red signal. (B) Micrographs show  
99 representative images of RAW264.7 GFPLC3 cells infected with Hoescht 3342-  
100 stained *L. dumoffii* (bottom) at 3, 4 and 5 hours post-infection. Co-localization  
101 of LC3 and lysotracker signals was not readily observed. However, the  
102 appearance of lysotracker positive signals associating with *L. dumoffii* was  
103 more frequently observed at >3 hours post-infection, after the peak of LC3  
104 association.  
105

106 **Text S1. Supplementary Tables S1-S3.**

107 Tables S1-S3 list the bacterial strains, plasmids and primers used in this study,  
 108 respectively.

109

110 **Table S1. Bacterial strains**

111

| Strain                                | Genotype (name in study)                                                                  | Reference    |
|---------------------------------------|-------------------------------------------------------------------------------------------|--------------|
| <i>Legionella pneumophila</i>         |                                                                                           |              |
| Lp01                                  | <i>Legionella pneumophila</i> serogroup 1,<br>Lp01 <i>rpsL</i>                            | <sup>1</sup> |
| Lp01 $\Delta$ <i>dotA</i>             | Lp01 $\Delta$ <i>dotA rpsL</i>                                                            | <sup>2</sup> |
| Lp01 $\Delta$ <i>ravZ</i>             | Lp01 $\Delta$ <i>ravZ rpsL</i>                                                            | This study   |
| Lp01 pmCherry                         | <i>Legionella pneumophila</i> serogroup 1,<br>Lp01 <i>rpsL</i> + pMMB207:: <i>mCherry</i> | This study   |
| Lp01 $\Delta$ <i>dotA</i><br>pmCherry | Lp01 $\Delta$ <i>dotA rpsL</i> + pMMB207:: <i>mCherry</i> ,                               | This study   |
| <i>Legionella dumoffii</i>            |                                                                                           |              |
| Ld00                                  | <i>Legionella dumoffii</i> NY23 (ATCC33279)                                               | <sup>3</sup> |
| Ld01                                  | Ld00, Str <sup>R</sup>                                                                    | This study   |
| Ld01 $\Delta$ <i>dotA</i>             | <i>L dumoffii</i> $\Delta$ <i>dotA</i> , Str <sup>R</sup>                                 | This study   |
| Ld01 $\Delta$ <i>flaA</i>             | <i>L dumoffii</i> $\Delta$ <i>flaA</i> , Str <sup>R</sup>                                 | This study   |
| Ld01 $\Delta$ <i>dotA</i><br>pmCherry | <i>L dumoffii</i> $\Delta$ <i>dotA</i> + pMMB207:: <i>mCherry</i><br>Str <sup>R</sup> ,   | This study   |
| Ld01 $\Delta$ <i>flaA</i><br>pmCherry | <i>L dumoffii</i> $\Delta$ <i>flaA</i> + pMMB207:: <i>mCherry</i><br>Str <sup>R</sup> ,   | This study   |

|                                                |                                                                                                                        |              |
|------------------------------------------------|------------------------------------------------------------------------------------------------------------------------|--------------|
| <i>Salmonella enterica</i> serover Typhimurium |                                                                                                                        |              |
| SR-11 $\chi$ 3181                              | Prototoroph, mouse-passaged $\chi$ 3041                                                                                | <sup>4</sup> |
| SR-11 pmCherry                                 | SR-11 + pMMB207::mCherry                                                                                               | This study   |
| <i>E. coli</i>                                 |                                                                                                                        |              |
| DH5 $\alpha$                                   | endA1 hsdR17 supE44 thi-1 recA1 gyrA<br>relA1 $\Delta$ (lacIZYA-argF)U169, deoR<br>( $\phi$ 80dlac $\Delta$ (lacZ)M15) | Invitrogen   |
| DH5 $\alpha$ ( $\lambda$ pir)                  | DH5 $\alpha$ $\lambda$ pir phage lysogen                                                                               | <sup>2</sup> |
| MT607 pRK600                                   | MT607 <i>E. coli</i> containing plasmid<br>pRK600; ColE1 replicon with RK2<br>transfer genes                           | <sup>5</sup> |

112

113

114 **Table S2. Plasmids used.**

115

| Plasmid Name                  | Provided by                                                                                            | Reference     |
|-------------------------------|--------------------------------------------------------------------------------------------------------|---------------|
| pEGFP-LC3                     | M. Ogawa                                                                                               | <sup>6</sup>  |
| pLEXEF.pur.GFP-LC3            | Kenji Matsuzawa                                                                                        | This study    |
| pEGFP-galectin-3              | M. Ogawa                                                                                               | <sup>7</sup>  |
| pEGFP-galectin-8              | M. Ogawa                                                                                               | This study    |
| pTecpr1-EGFP                  | M. Ogawa                                                                                               | <sup>7</sup>  |
| pEGFP-p62                     | M. Ogawa                                                                                               | <sup>8</sup>  |
| pEGFP-NDP52                   | M. Ogawa                                                                                               | This study    |
| pTLR2                         | K. Kobiyama/F. Takeshita                                                                               | <sup>9</sup>  |
| pTLR4                         | K. Kobiyama/F. Takeshita                                                                               |               |
| pSR47S                        | R6K suicide vector, Km <sup>R</sup> , sacB                                                             | <sup>10</sup> |
| pSR47SLd $\Delta$ <i>flaA</i> | pSR47S containing 5' and 3' flanking genomic regions of <i>L. dumoffii flaA</i> (for gene deletion)    | This study    |
| pSR47SLd $\Delta$ <i>dotA</i> | pSR47S containing 5' and 3' flanking genomic regions of <i>L. dumoffii dotA</i> (for gene deletion)    | This study    |
| pSR47SLp $\Delta$ <i>ravZ</i> | pSR47S containing 5' and 3' flanking genomic regions of <i>L. pneumophila ravZ</i> (for gene deletion) | This study    |
| pMMB207                       | Cloning vector derived from RSF1010                                                                    | <sup>11</sup> |

|                               |                                                             |               |
|-------------------------------|-------------------------------------------------------------|---------------|
| pAM239                        | pMMB207 containing <i>gfpmut3</i>                           | <sup>12</sup> |
| pMMB207::<br>mCherry          | pMMB207 containing <i>mCherry</i>                           | This study    |
| pMMB207- <i>ravZ</i>          | pMMB207 encoding <i>L. pneumophila</i><br><i>ravZ</i>       | This study    |
| pMMB207- <i>ravZ</i><br>C258A | pMMB207 encoding <i>L. pneumophila</i><br><i>ravZ</i> C258A | This study    |

116

117

118 **Table S3. List of primers used in this study**

119

|                               |                                               |                  |
|-------------------------------|-----------------------------------------------|------------------|
| pSR47SLd $\Delta$ <i>dotA</i> | 5'-<br>cggagctcATCAATACTACTCTCCATTA-<br>3'    | $\Delta$ mutants |
|                               | 5'-<br>AAAGAAATGAAAGTAGAATTGGTCGT<br>GTTA-3'  |                  |
|                               | 5'-<br>AATTCTACTTTTCATTTCTTTTCTCCTA<br>ACA-3' |                  |
|                               | 5'-<br>gctctagaCCACTACTTACTACTATAGT-<br>3'    |                  |

|                               |                                                      |            |
|-------------------------------|------------------------------------------------------|------------|
| pSR47SLd $\Delta$ <i>flaA</i> | 5'-<br>cg <b>gagctc</b> ACGAGCCGATATCCTGTGA<br>T-3'  |            |
|                               | 5'-<br>TTTTCTATAAATTTTAGTCTCCTCAGA<br>CCT-3'         |            |
|                               | 5'-<br>AGACTAAAATTTATAGAAAAAGATGT<br>AAGA-3'         |            |
|                               | 5'-<br>g <b>ctctaga</b> AAAGCAGACAATTCCATAG<br>-3'   |            |
| pSR47SLp $\Delta$ <i>ravZ</i> | 5'-<br>cg <b>gagctc</b> CTCAACCCCTTTATTTAG<br>-3'    |            |
|                               | 5'-<br>CAATTCACACTATTTGACCTCTAAAC<br>TG -3'          |            |
|                               | 5'-<br>AGAGGTCAAATAGTGTGAATTGAATT<br>C -3'           |            |
|                               | 5'-<br>g <b>ctctaga</b> GGCTGACTGCAAAAGAGAG<br>C -3' |            |
| pSR47Sac1                     | 5'-TAGCTCACTCATTAGGCACC-3'                           | Sequencing |



|                            |                                                               |                       |
|----------------------------|---------------------------------------------------------------|-----------------------|
| pSR47SXba1                 | 5'-CTGTTTCTTTTCATTCTCTG-3'                                    |                       |
| GFPLC3 f                   | 5'-<br>AAAAAGCAGGCTATGGTGAGCAAGG<br>GCGAG-3'                  | Cloning               |
| GFPLC3 r                   | 5'-<br>AGAAAGCTGGGTGTGGTATGGCTGA<br>TTATGATC-3'               |                       |
| Ulk1 f_2                   | 5'-GCAAGGACTCTTCCTGTGACAC-3'                                  | RT-PCR                |
| Ulk1 r_2                   | 5'-CCACTGCACATCAGGCTGTCTG-3'                                  |                       |
| Ulk1 f                     | 5'-AAGAACCTCGCCAAGTCTCA-3'                                    |                       |
| Ulk1 r                     | 5'-CCGTTGCAGTACTCCATAACC-3'                                   |                       |
| GAPDH_f                    | 5'-ACAGTCAGCCGCATCTTCTT-3'                                    |                       |
| GAPDH_r                    | 5'-ACGACCAAATCCGTTGACTC-3'                                    |                       |
| GFP-Galectin8 f<br>(BglII) | 5'-<br><b>gaagatct</b> ATGATGTTGTCCTTAAACAA<br>CCTAC-3'       |                       |
| GFP-Galectin8 r<br>(Sall)  | 5'-<br>ggccgac <b>gtcgac</b> CTACCAGCTCCTTACT<br>TCCAGTAAG-3' |                       |
| GFP-NDP52 f<br>(EcoRI)     | 5'-<br>ccg <b>gaattc</b> ATGGAGGAGACCATCAAAG<br>ATCCC-3'      | Cloning<br>(pEGFP-C2) |
| GFP-NDP52 r (Sall)         | 5'-<br>ggccgac <b>gtcgac</b> GAGAGAGTGGCAGAA<br>CACGTGGTC-3'  |                       |

|                       |                                                      |                              |
|-----------------------|------------------------------------------------------|------------------------------|
| <i>ravZ</i> f (BamHI) | 5'-<br>gc <b>ggatcc</b> AGAAAGGCAAGTTAACAGG-<br>3'   | Cloning<br>(pMMB207)         |
| <i>ravZ</i> r (Xbal)  | 5'-<br>g <b>ctctaga</b> CTATTTTACCTTAATGCCAC<br>C-3' |                              |
| <i>ravZ</i> C258A f   | 5'-<br>GAAGGCAATGCCGGGTCTTATACC-3'                   | Site-directed<br>mutagenesis |
| <i>ravZ</i> C258A r   | 5'-<br>GGTATAAGACCCGGCATTGCCTTC-3'                   |                              |

120

121

122 **References**

123

124

125

- 126 1 Berger, K. H. & Isberg, R. R. Two distinct defects in intracellular growth  
127 complemented by a single genetic locus in *Legionella pneumophila*. *Mol*  
128 *Microbiol* **7**, 7-19 (1993).
- 129 2 Zuckman, D. M., Hung, J. B. & Roy, C. R. Pore-forming activity is not sufficient  
130 for *Legionella pneumophila* phagosome trafficking and intracellular  
131 growth. *Mol Microbiol* **32**, 990-1001 (1999).
- 132 3 Brenner, D. J. *et al.* *Legionella-Bozemanii* Sp-Nov and *Legionella-Dumoffi*  
133 Sp-Nov - Classification of 2 Additional Species of *Legionella* Associated with  
134 Human Pneumonia. *Curr Microbiol* **4**, 111-116 (1980).
- 135 4 Curtiss, R., 3rd & Kelly, S. M. *Salmonella typhimurium* deletion mutants  
136 lacking adenylate cyclase and cyclic AMP receptor protein are avirulent  
137 and immunogenic. *Infect Immun* **55**, 3035-3043 (1987).
- 138 5 Finan, T. M., Kunkel, B., De Vos, G. F. & Signer, E. R. Second symbiotic  
139 megaplasmid in *Rhizobium meliloti* carrying exopolysaccharide and  
140 thiamine synthesis genes. *J Bacteriol* **167**, 66-72 (1986).
- 141 6 Kabeya, Y. *et al.* LC3, a mammalian homologue of yeast Apg8p, is localized  
142 in autophagosome membranes after processing. *EMBO J* **19**, 5720-5728  
143 (2000).
- 144 7 Ogawa, M. *et al.* A Tecpr1-dependent selective autophagy pathway targets  
145 bacterial pathogens. *Cell Host Microbe* **9**, 376-389 (2011).
- 146 8 Yoshikawa, Y., Ogawa, M., Hain, T., Chakraborty, T. & Sasakawa, C. *Listeria*  
147 *monocytogenes* ActA is a key player in evading autophagic recognition.  
148 *Autophagy* **5**, 1220-1221 (2009).
- 149 9 Takeshita, F. *et al.* TRAF4 acts as a silencer in TLR-mediated signaling  
150 through the association with TRAF6 and TRIF. *Eur J Immunol* **35**, 2477-  
151 2485 (2005).
- 152 10 Merriam, J. J., Mathur, R., Maxfield-Boumil, R. & Isberg, R. R. Analysis of the  
153 *Legionella pneumophila* *fliI* gene: intracellular growth of a defined mutant  
154 defective for flagellum biosynthesis. *Infect Immun* **65**, 2497-2501 (1997).
- 155 11 Morales, V. M., Backman, A. & Bagdasarian, M. A series of wide-host-range  
156 low-copy-number vectors that allow direct screening for recombinants.  
157 *Gene* **97**, 39-47 (1991).
- 158 12 Coers, J., Monahan, C. & Roy, C. R. Modulation of phagosome biogenesis by  
159 *Legionella pneumophila* creates an organelle permissive for intracellular  
160 growth. *Nat Cell Biol* **1**, 451-453 (1999).

161

162
